# Supplementary material
Source: publisher figshare collection journal article supplement (https://tandf.figshare.com/articles/dataset/_/5756055)
Supplement: Supplementary file 1 [file 1]

Archive with 3 entries (3 files):
- Supplemental Material 1.pdf
- Supplemental Material 2.pdf
- Supplemental Material 3.pdf
