# Supplementary material
Source: publisher figshare collection journal article supplement (https://tandf.figshare.com/articles/dataset/_/5756055)
Supplement: Supplementary file 1 [file 1 › Supplemental Material 1.pdf]

## Supplemental Material 1

### *Time steps for the leak localization method*

To execute the leak localization method three different time steps are needed (Figure A-1). These are the sensor sample time ( $T_s$ ), scenario analysis time step ( $T_a$ ) and the diagnosis sliding window ( $T_w$ ) (Meseguer et al., 2014).

$T_s$  are the sample times of the DMA instrumentation.  $T_a$  is the time step used to compute the fault indicator vector  $\phi$  and the FSM.  $T_a$  needs to be smaller or equal to  $T_s$ . When  $T_a$  is smaller than  $T_s$ , the sensor measurements are averaged. This reduces the effect of ‘nuisance noise’ affecting the measurements (Meseguer et al., 2014). ‘ $T_w$  determines the past time window considered to compute the leakage localization result (Meseguer et al., 2014)’. When  $T_w$  is equal to  $T_a$ , the Pearson correlation coefficient is calculated directly. When  $T_w$  is larger than  $T_a$ , the  $\phi^*(t)$  and  $FSM^*(t)$  are created by concatenating the  $\phi(t)$  and  $FSM(t)$  of the time analysis steps ( $T_a$ ). These  $\phi^*(t)$  and  $FSM^*(t)$  are then used to calculate the correlation values. When  $T_w$  is larger than  $T_a$  the effect of one time analysis step that is affected by anomalies, is reduced and the leak localization method gets more robust (Meseguer et al., 2014). More details are described and explained in (Pérez et al., 2011a; Meseguer et al., 2014). Subsequently, the correlation values for one node for multiple  $T_a$ s or  $T_w$ s can be accumulated whether or not above a certain value (Pérez et al., 2014b).

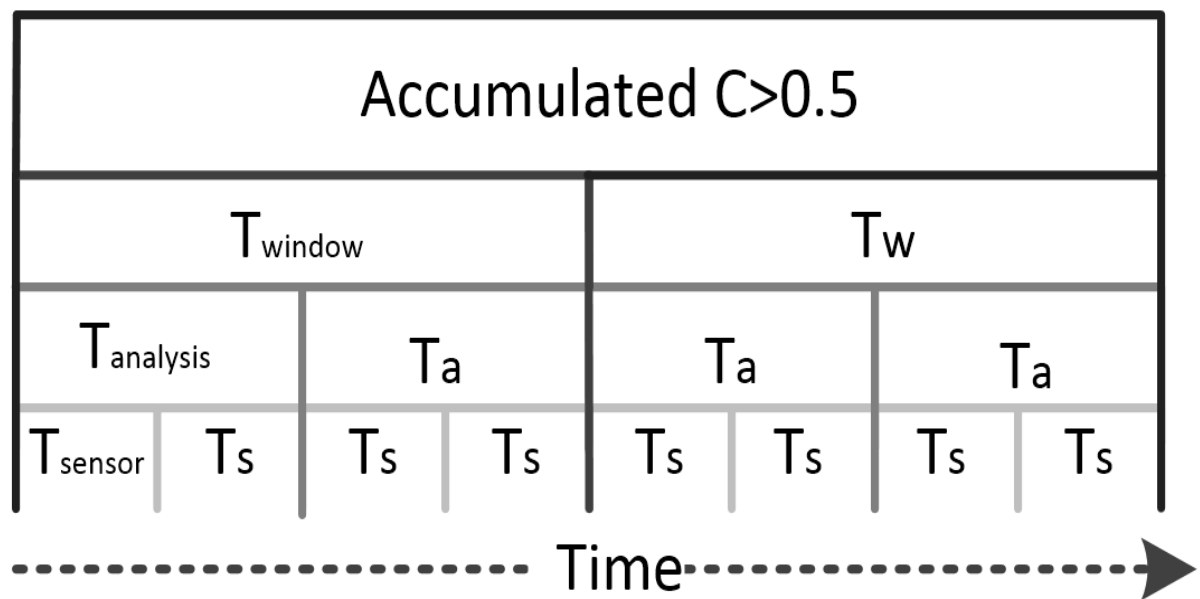

**Figure A-1.** Example different time steps to perform the leak localization. The correlation value  $c$  of multiple  $T_a$ s or  $T_w$ s can be added to get the accumulated correlation value.
