# Supplementary material
Source: publisher figshare collection journal article supplement (https://tandf.figshare.com/articles/dataset/_/5756055)
Supplement: Supplementary file 1 [file 1 › Supplemental Material 2.pdf]

## Supplemental Material 2

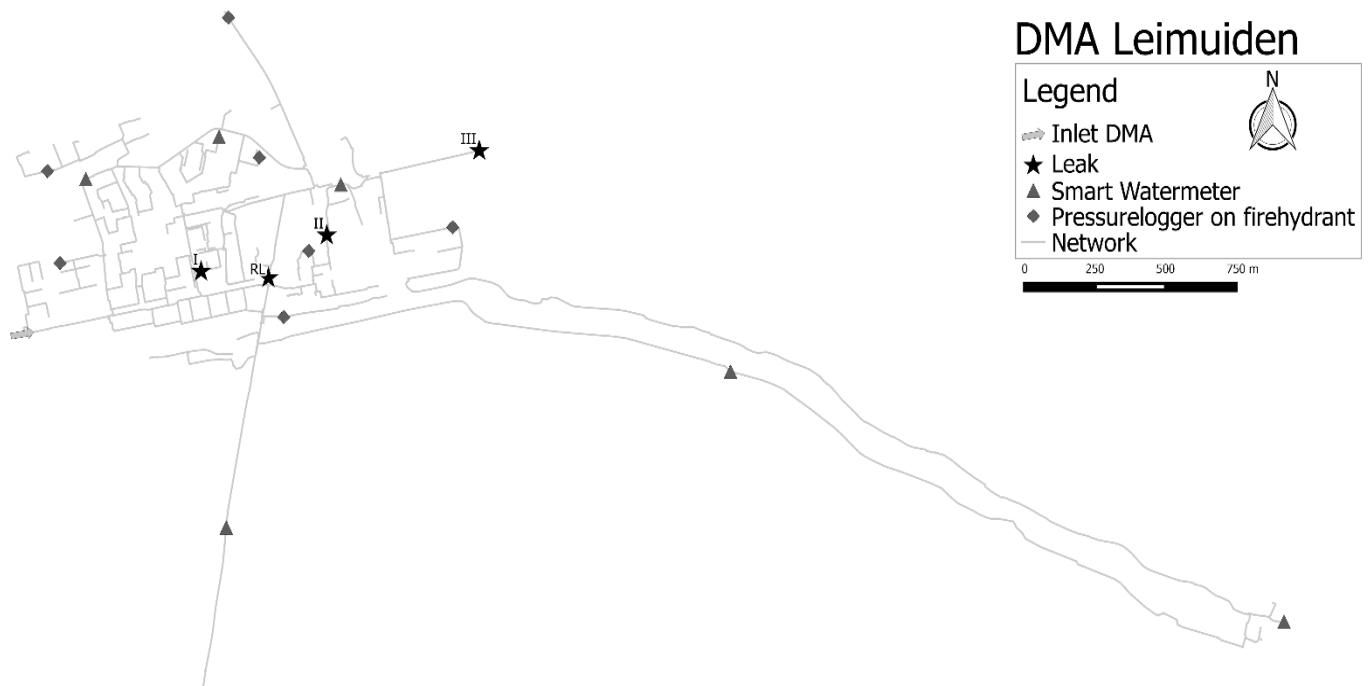

**Figure A-2.** Sensor deployment and (artificial) leak locations and inlet in DMA Leimuiden. Seven pressure loggers and six smart meters were present during artificial leaks. During the real leak only the smart meters were present.
