# Supplementary material
Source: publisher figshare collection journal article supplement (https://tandf.figshare.com/articles/dataset/_/5756055)
Supplement: Supplementary file 1 [file 1 › Supplemental Material 3.pdf]

### Supplemental Material 3

**Table A-1.** The times and locations of the artificial leak campaign (locations in Supplemental Material 2). A minimum waiting time of 15 minutes in between both leaks was observed to allow flows to stabilize.

|                     | Night (18-11-2015)                |                                    | Morning peak (19-11-2015)         |                                    | Daytime (19-11-2015)              |                                    |
|---------------------|-----------------------------------|------------------------------------|-----------------------------------|------------------------------------|-----------------------------------|------------------------------------|
|                     | 15 m <sup>3</sup> h <sup>-1</sup> | 7.5 m <sup>3</sup> h <sup>-1</sup> | 15 m <sup>3</sup> h <sup>-1</sup> | 7.5 m <sup>3</sup> h <sup>-1</sup> | 15 m <sup>3</sup> h <sup>-1</sup> | 7.5 m <sup>3</sup> h <sup>-1</sup> |
| <b>Location I</b>   | 00:30-00:45                       | 01:00-01:15                        | 06:45-07:00                       | 07:15-07:30                        | 09:30-09:45                       | 10:00-10:15                        |
| <b>Location II</b>  | 01:45-02:00                       | 02:15-02:30                        | -                                 | -                                  | 10:45-11:00                       | 11:15-11:30                        |
| <b>Location III</b> | 03:00-03:15                       | 03:30-03:45                        | 08:00-08:15                       | 08:30-08:45                        | 13:00-13:15                       | 13:30-13:45                        |
